# Supplementary material for: Fast synthesis of high-quality reduced graphene oxide at room temperature under light exposure
Source: Royal Society of Chemistry journal article supplement (doi:10.1039/c4nr03009e), 2014-01-01
Supplement: c4nr03009e1.pdf [file c4nr03009e1.pdf]

## Electronic Supporting Information

### **Fast Synthesis of High-Quality Reduced Graphene Oxide at Room Temperature under Light Exposure**

Surajit Some<sup>1</sup>, Sungjin Kim<sup>1</sup>, Khokan Samanta<sup>1</sup>, Youngmin Kim<sup>1</sup>, Yeoheung Yoon<sup>1,2</sup>,  
Younghun Park<sup>1</sup>, Sae Mi Lee<sup>1</sup>, Keunsik Lee<sup>1</sup>, and Hyoyoung Lee<sup>1,2,3\*</sup>

<sup>1</sup>National Creative Research Initiative, Center for Smart Molecular Memory, Department of  
Chemistry, Sungkyunkwan University, 2066 Seoburo, Jangan-Gu, Suwon, Gyeonggi-Do 440-  
746, Republic of Korea

<sup>2</sup>Department of Energy Science, Sungkyunkwan University, 2066 Seoburo, Jangan-Gu,  
Suwon, Gyeonggi-Do 440-746, Republic of Korea

<sup>3</sup>SKKU Advanced Institute of Nano Technology (SAINT), Sungkyunkwan University, 2066  
Seoburo, Jangan-Gu, Suwon, Gyeonggi-Do 440-746, Republic of Korea

E-mail: [hyoyoung@skku.edu](mailto:hyoyoung@skku.edu) (H. Lee)

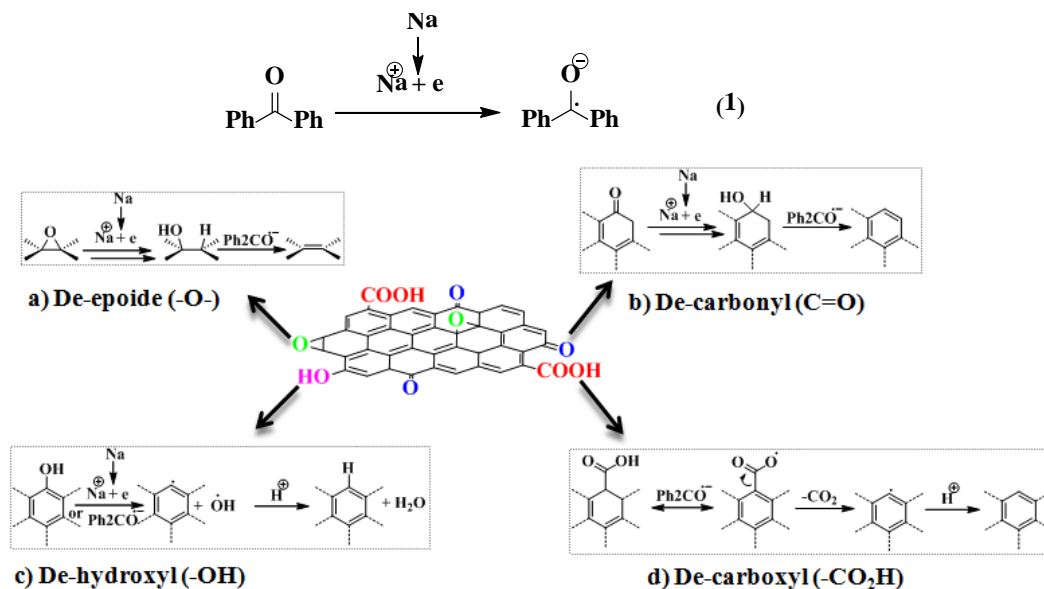

**Figure S1.** Possible reduction mechanism and procedure for preparing the rGO<sub>Na-B1</sub> sheets with solvated radical anion with electron from sodium.<sup>1,2,3</sup>

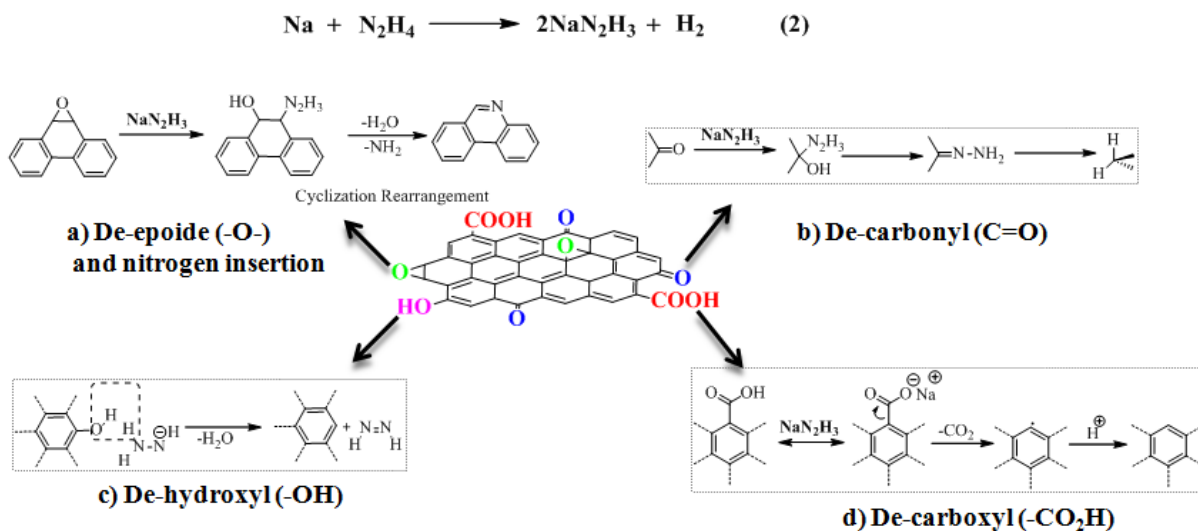

**Figure S2.** Possible reduction mechanism and procedure for preparing the rGO<sub>Na-H3</sub> and rGO<sub>Na-H4</sub> sheets with sodium hydrazide complex, NaN<sub>2</sub>H<sub>3</sub>.<sup>4,5,6</sup>

As per our hypothesis, in case of formation of the rGO<sub>Na-B-H2</sub> sheets by the use of Na-B-H reducing system, both mechanisms were employed.

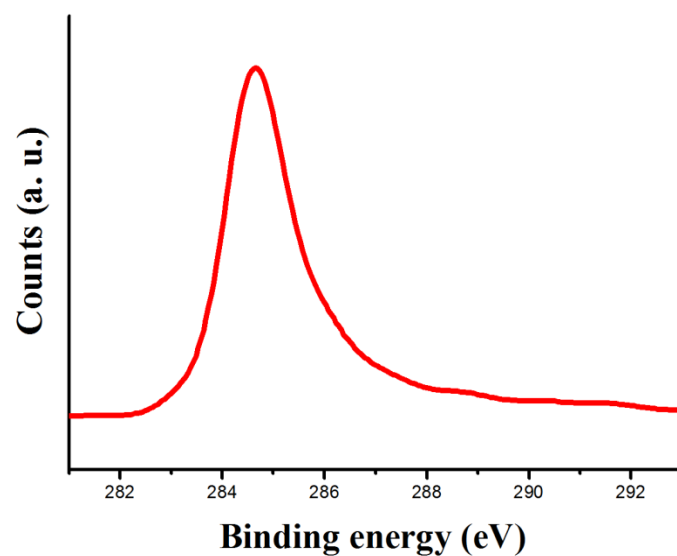

**Figure S3.** XPS spectra of graphite.

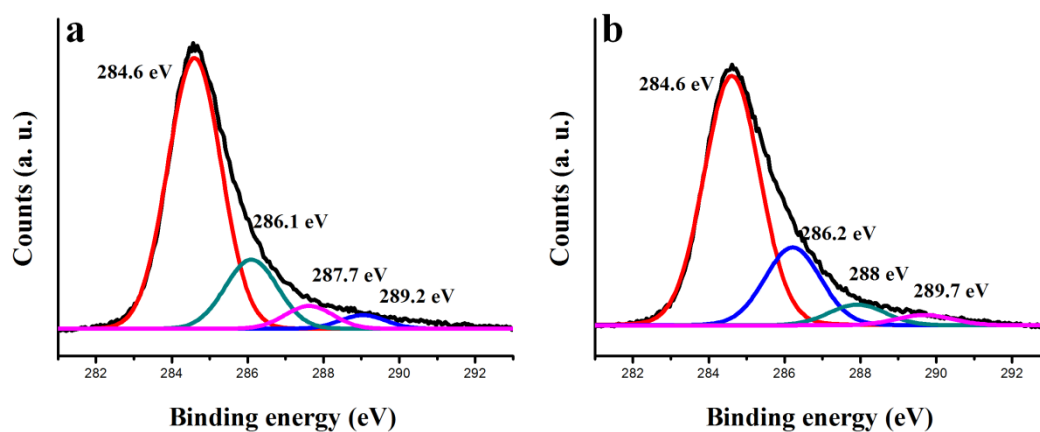

**Figure S4.** C1s spectra of rGONa-H3 (a) and rGONa-H4 (b) sheets.

The C1S of rGONa-H3 contained the peaks at 286.1 eV (C-O and C-N combined), 287.7 eV (C=O), 289.2 (C(O)OH) ); whereas C1S of rGONa-H4 contain the peaks at 286.2 eV (C-O and C-N combined), 288 eV (C=O), 289.7 (C(O)OH).

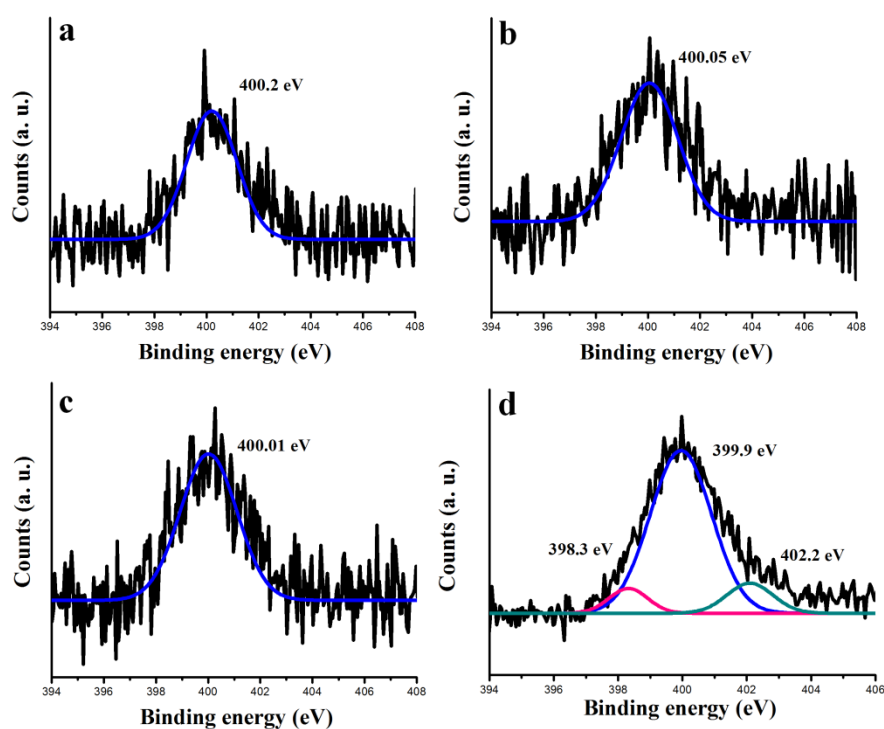

**Figure S5.** N1s spectra of rGO<sub>Na-B-H2</sub> (a), rGO<sub>Na-H3</sub> (b), rGO<sub>Na-H4</sub> (c) and rGO<sub>H</sub> (d) sheets.

In the N1s peaks in the XPS spectra; peak was found about ~398 eV, which could be attributed to pyridinic N, the peak ~400 eV were attributed to amide, amine, or pyrrolic N, and the peak at ~402 eV is commonly attributed to oxidized nitrogen.<sup>6</sup>

**Table S1.** Comparison of XPS analysis results of as made rGOs.

| Entry | Reduction Process                        | Temperature | C/O  | N (%) | N1s (eV)            |
|-------|------------------------------------------|-------------|------|-------|---------------------|
| 1.    | GO                                       | -           | 2.01 | 0.32  | -                   |
| 2.    | Sodium-Benzophenone / UV light           | rt          | 13.9 | 0.38  | -                   |
| 3.    | Sodium-Benzophenone-Hydrazine / UV light | rt          | 16.2 | 3.8   | 400.2               |
| 4.    | Sodium-Hydrazine dil                     | ~50 °C      | 10.9 | 2.9   | 400.05              |
| 5.    | Sodium-Hydrazine Conc                    | ~50 °C      | 12.6 | 4.1   | 400.02              |
| 6.    | Hydrazine                                | 100 °C      | 12.1 | 3.4   | 398.3, 399.9, 402.2 |
| 7.    | Graphite                                 | -           | 71.8 | 0.1   | -                   |

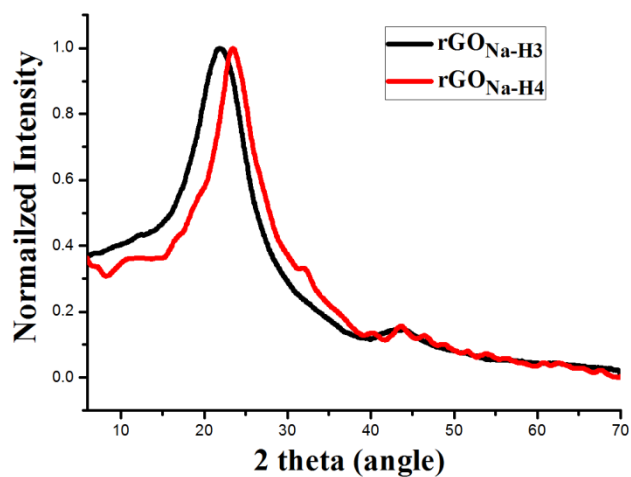

**Figure S6.** XRD spectra of  $rGO_{Na-H3}$  and  $rGO_{Na-H4}$  sheets.

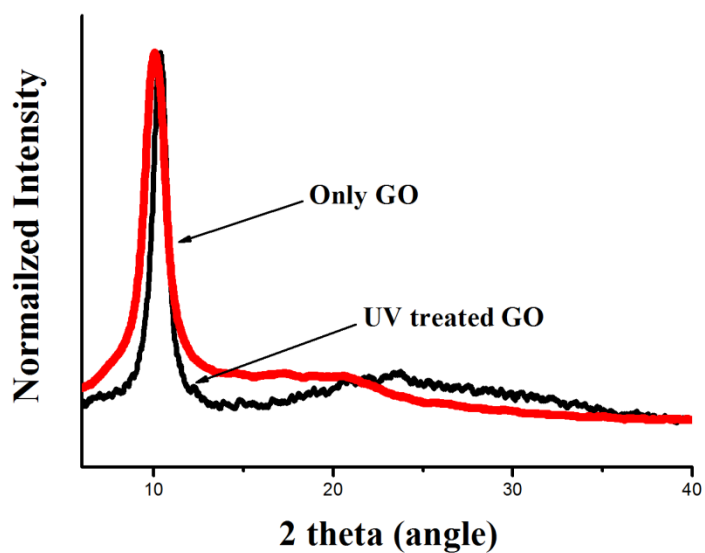

**Figure S7.** XRD spectra of only GO and GO solution treated with UV lamp for 24 h.

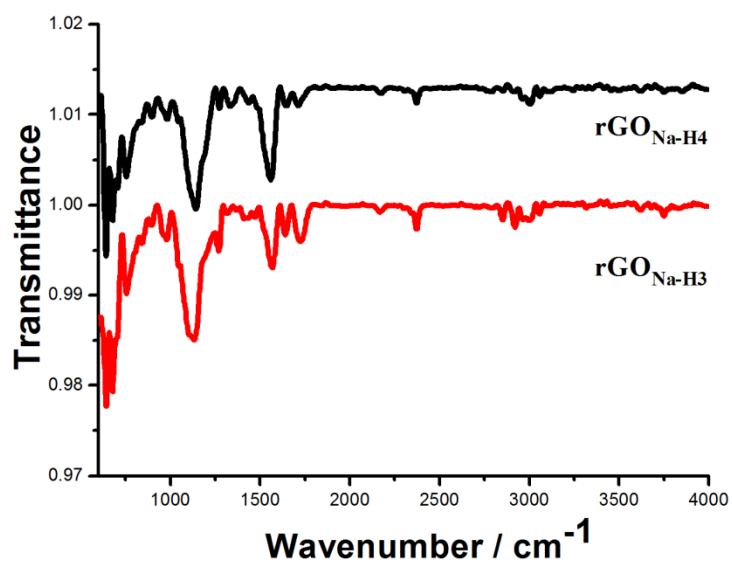

**Figure S8.** FTIR spectra of rGO<sub>Na-H3</sub> and rGO<sub>Na-H4</sub> sheets.

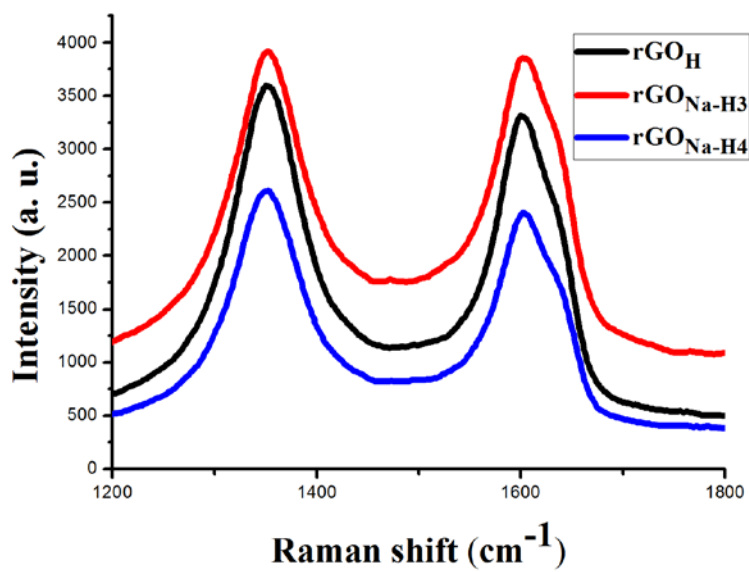

**Figure S9.** Raman spectra of rGO<sub>H</sub>, rGO<sub>Na-H3</sub> and rGO<sub>Na-H4</sub> sheets.

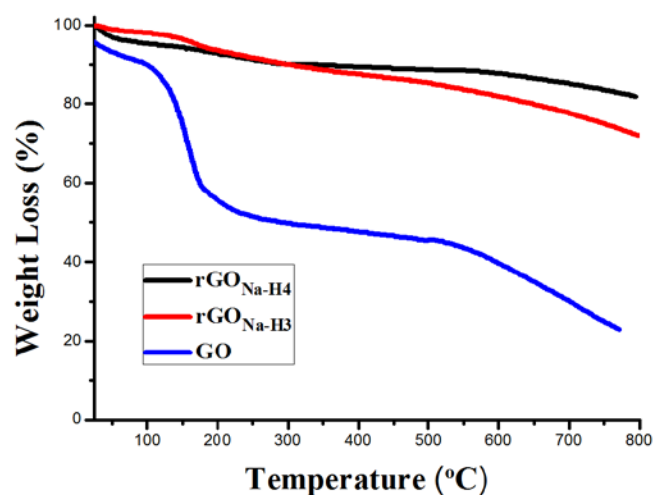

**Figure S10.** TGA thermograms for GO, rGO<sub>Na-H3</sub> and rGO<sub>Na-H4</sub> sheets.

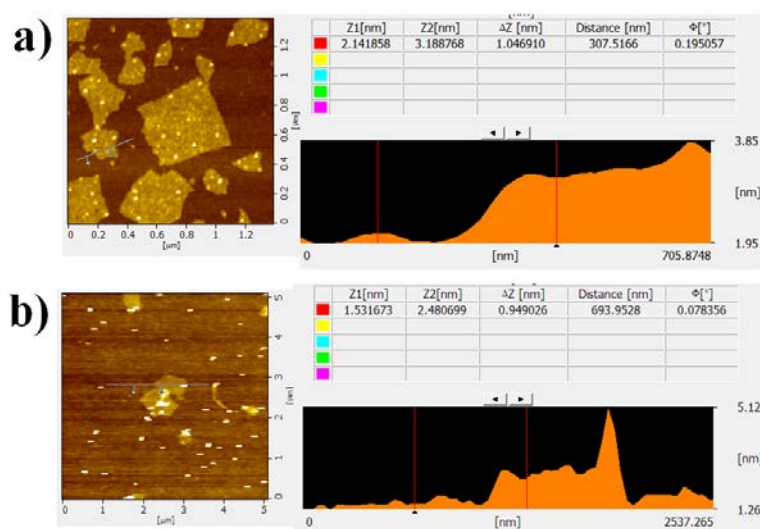

**Figure S11.** (a) AFM image of as-prepared rGO<sub>Na-B1</sub> sheet using Na-B system. (b) AFM image of as-prepared rGO<sub>Na-B-H2</sub> sheet using Na-B-H system.

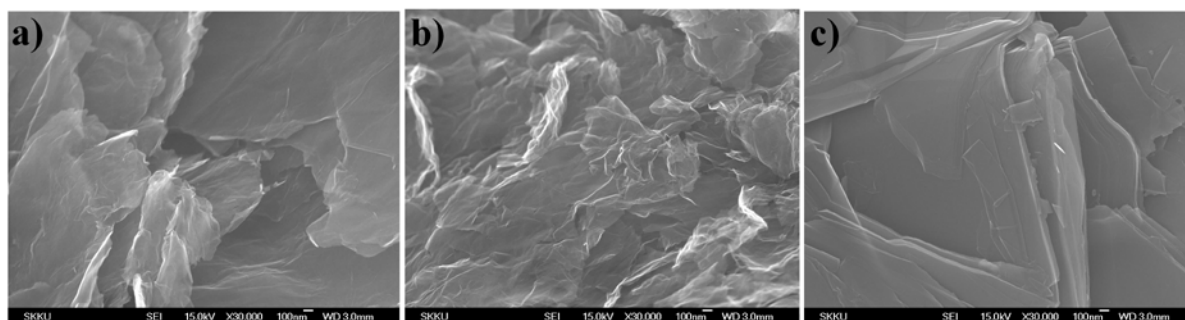

**Figure S12.** SEM images of (a) rGO<sub>Na-H3</sub>, (b) rGO<sub>Na-H4</sub> sheets and (c) graphite.

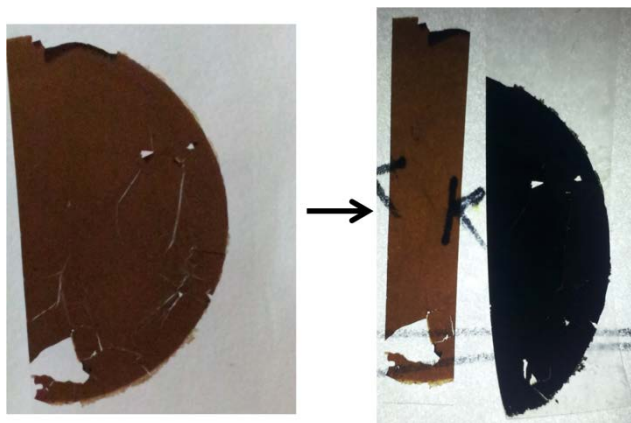

**Figure S13.** Photograph of GO and rGO film on PET.

**Table S2.** Comparison of sheet resistance of as made rGOs.

| Entry | Type                   | Sheet resistance<br>$\Omega/\text{square}$ | Thickness of film or<br>pellets ( $\mu\text{m}$ ) |
|-------|------------------------|--------------------------------------------|---------------------------------------------------|
| 1.    | rGO <sub>Na-B1</sub>   | ~200<br>~9                                 | ~4.2 (film)<br>~11.1 (pellet)                     |
| 2.    | rGO <sub>Na-B-H2</sub> | ~130<br>~5                                 | ~4.1 (film)<br>~10.8 (pellet)                     |
| 3.    | rGO <sub>Na-H3</sub>   | ~20                                        | ~11.5 (pellet)                                    |
| 4.    | rGO <sub>Na-H4</sub>   | ~18                                        | ~10.2 (pellet)                                    |
| 5.    | rGO <sub>H</sub>       | ~32                                        | ~12 (pellet)                                      |

**Table S3.** Comparison of sheet resistance and C/O ratio of other methods.

| Reference                                      | Sheet resistance<br>$\Omega/\text{square}$ | C/O   | Method                                |
|------------------------------------------------|--------------------------------------------|-------|---------------------------------------|
| <i>Nature Commun.</i> <b>2010</b> ,<br>1, 73   | ~19.6<br>(~6.5 $\mu\text{m}$ )             | 11.46 | HI-AcOH, 40 °C, 40 h                  |
| <i>Nature Commun.</i> <b>2013</b> ,<br>4, 1539 | ~350<br>(Transparency 80%)                 | 16.61 | Na-NH <sub>3</sub> solution at -78 °C |



|                                                      |                                                         |             |                                                                                                |
|------------------------------------------------------|---------------------------------------------------------|-------------|------------------------------------------------------------------------------------------------|
| <i>Nature Nanotech.</i> <b>2008</b> , <i>3</i> , 270 | ~43000<br>(Transparency 63%)                            | -           | GO film reduced with hydrazine vapor and annealed at 200 °C                                    |
| <i>Nature</i> <b>2009</b> , <i>457</i> , 706         | ~280<br>(Transparency 80%)                              | -           | CVD graphene film                                                                              |
| <b>Our result</b>                                    | ~130 (~4.2 $\mu\text{m}$ )<br>~5 (~10.8 $\mu\text{m}$ ) | <b>16.2</b> | <b>GO film <i>in situ</i> reduction with sodium-benzophenone-hydrazine at room temperature</b> |

---

## References

- 1 D. B. G. Williams, M. Lawton, *J. Org. Chem.* 2010, **75**, 8351-8354.
- 2 C. G. Screttas, G. L Ioannou, D. G. Georgiou, *Russ. Chem. Bull.* 1995, **44**, 78-86.
- 3 H. Feng, R. Cheng, X. Zhao, X. Duan, J. Li, *Nat. Commun.* 2013, **4**, 1539-1546.
- 4 P. Patnaik, Handbook of inorganic chemicals. 2002, ISBN 0-07-049439-8.
- 5 R. Wang, Y. Wang, C. Xu, J. Sun, L. Gao, *RSC Adv.* 2013, **3**, 1194-1200.
- 6 Donghui. Long, W. Li, L. Ling, J. Miyawaki, I. Mochida, S. Yoon, *Langmuir* 2010, **26**, 16096-16102.
